# Supplementary material for: Mindfulness Meditation According to the Satipatthana Sutta: A Single-Case Study With Participants as Collaborators
Source: Springer Nature journal article supplement (doi:10.1007/s12671-023-02160-1), 2023-06-10
Supplement: MOESM1 [file 25474290]

Supplementary material: Results of the meta-analyses for the questionnaire items (forest plots with confidence intervals)

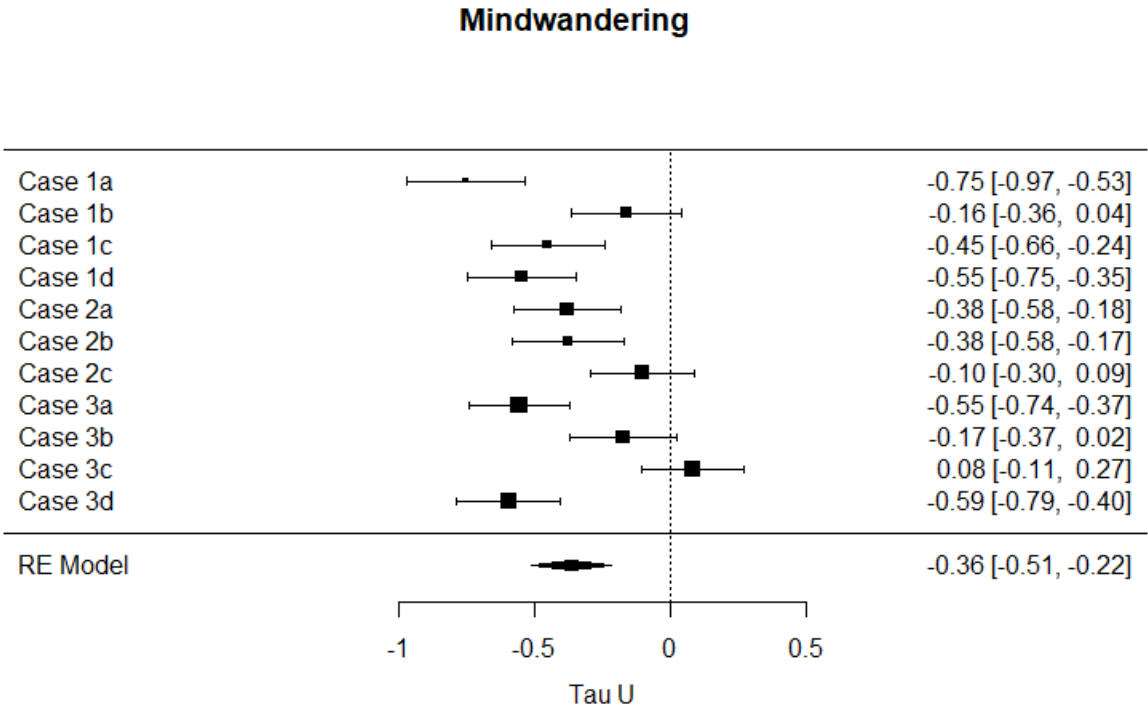

Figure S1. Forest plot of the effect sizes (Tau-U) for mindwandering.

## Decentering

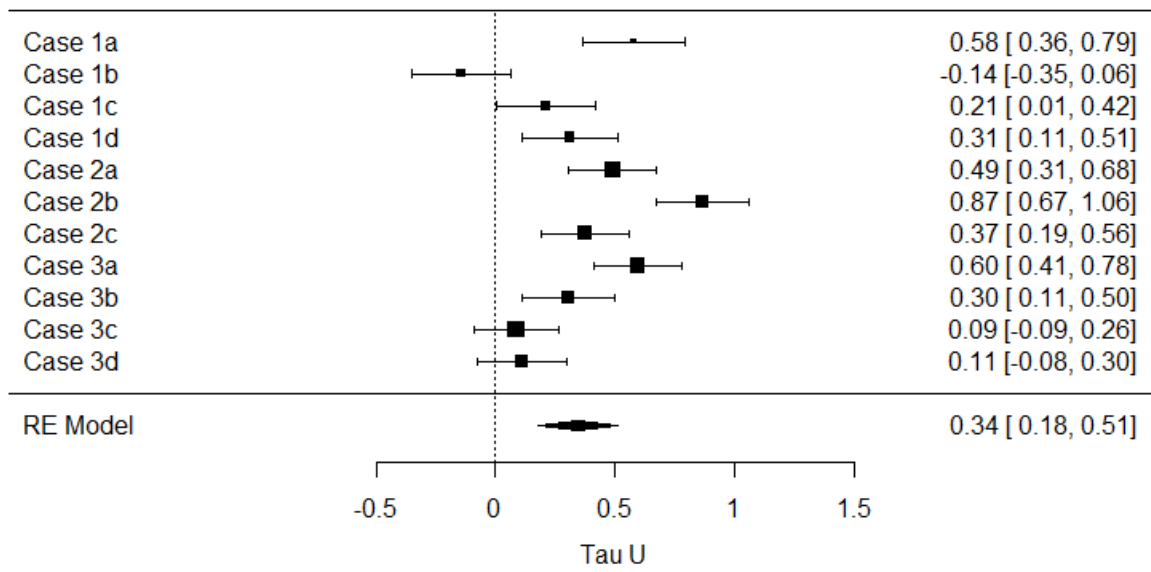

Figure S2. Forest plot of the effect sizes (Tau-U) for decentering.

### PANAS positive

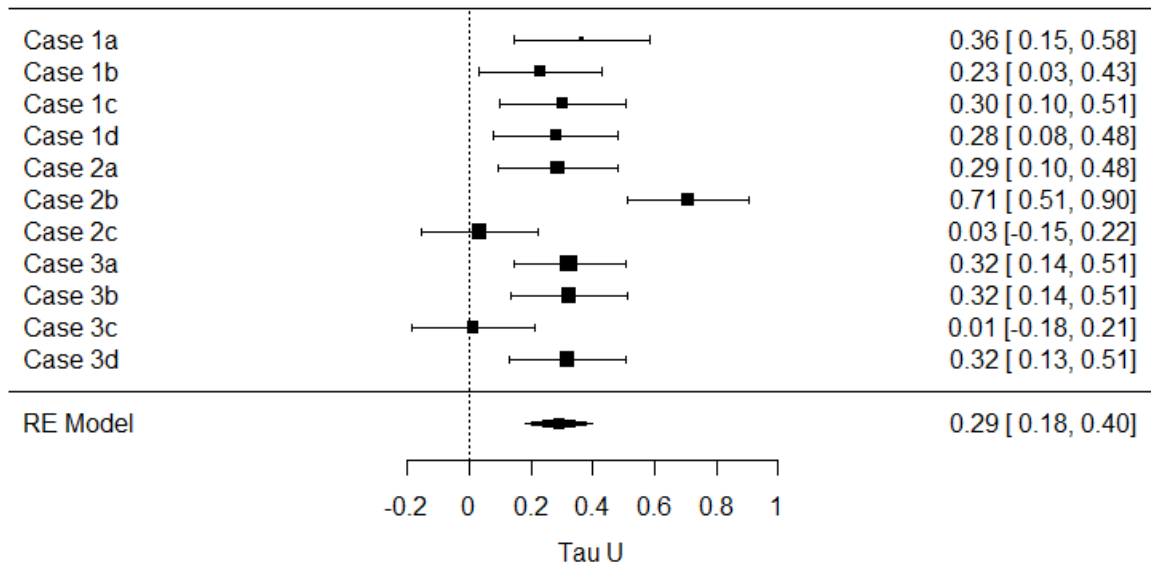

Figure S3. Forest plot of the effect sizes (Tau-U) for PANAS+.

## Wellbeing

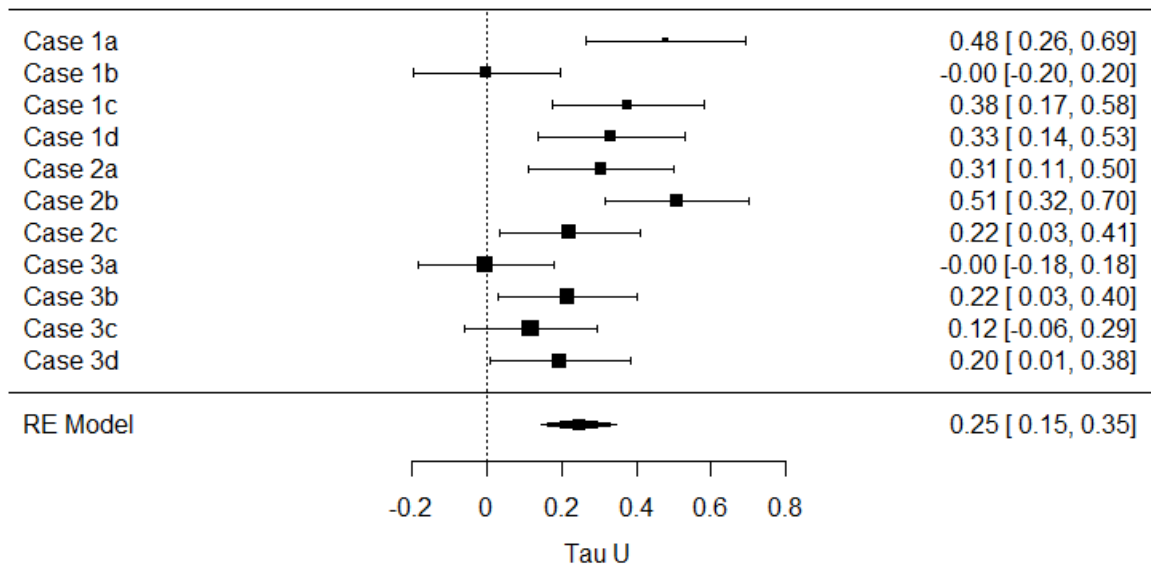

Figure S4. Forest plot of the effect sizes (Tau-U) for well-being.

### PANAS, negative

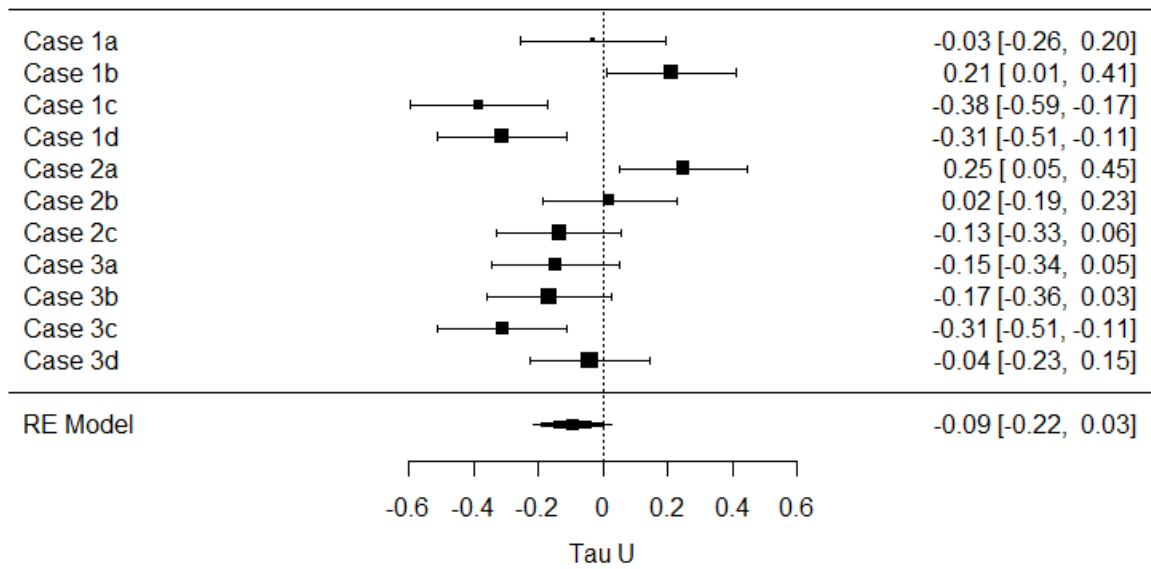

Figure S5. Forest plot of the effect sizes (Tau-U) for PANAS-.

### ER Reappraisal

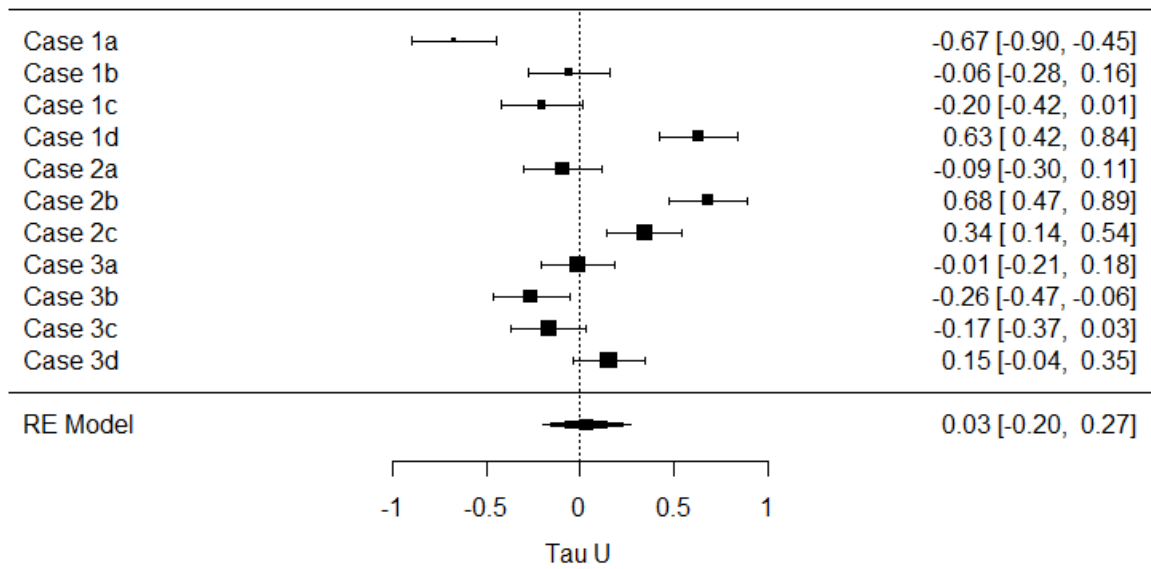

Figure S6. Forest plot of the effect sizes (Tau-U) for ER reappraisal.

### ER Suppression

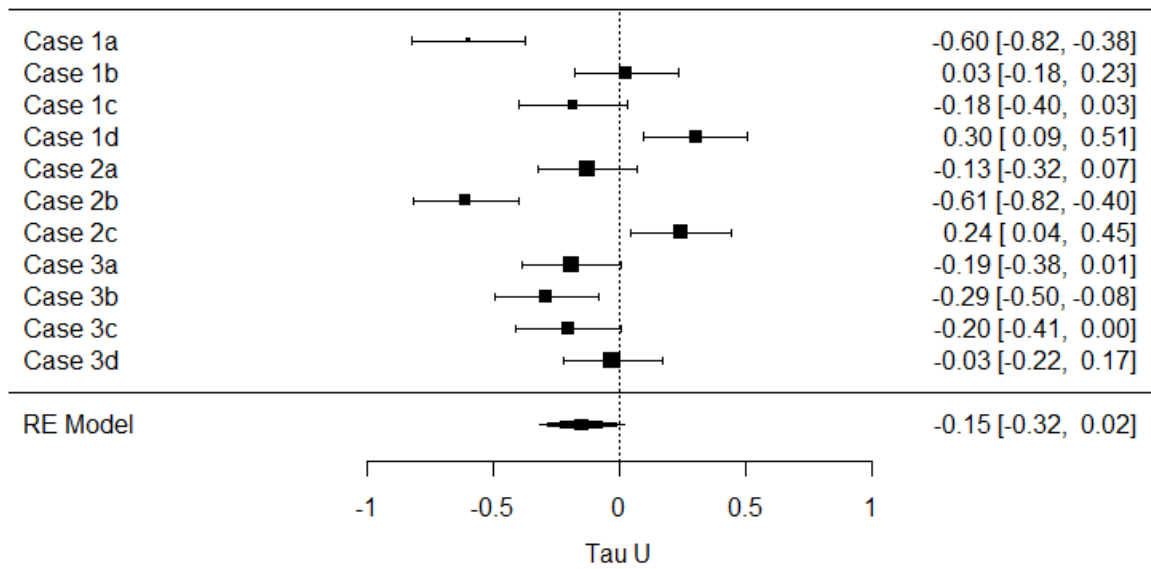

Figure S7. Forest plot of the effect sizes (Tau-U) for ER suppression.
